# Supplementary material for: A polymeric nanoformulation improves the bioavailability and efficacy of sorafenib for hepatocellular carcinoma therapy
Source: Royal Society of Chemistry journal article supplement (doi:10.1039/d0bm01881c), 2020-12-28
Supplement: d0bm01881c1.pdf [file d0bm01881c1.pdf]

## Supporting Information

### **Polymeric nanoformulation improves the bioavailability and efficacy of sorafenib for hepatocellular carcinoma therapy**

Yang Chen<sup>a,b</sup>, Jia-Xian Li<sup>a</sup>, Na Shu<sup>c</sup>, Sui-Juan Zheng<sup>a</sup>, Min Ma<sup>a</sup>, Zhi-Bin Zhao<sup>a</sup>, Zhi-Ting Cao<sup>\*e</sup>, Qi Zhou<sup>\*f,g</sup>, Jin-Zhi Du<sup>\*a,b</sup>, Jun Wang<sup>b,c,d</sup>

<sup>a</sup>Guangzhou First People's Hospital, and Institutes for Life Sciences, School of Medicine, South China University of Technology, Guangzhou 510006, China; E-mail: [djzhi@scut.edu.cn](mailto:djzhi@scut.edu.cn)

<sup>b</sup>National Engineering Research Center for Tissue Restoration and Reconstruction, Key Laboratory of Biomedical Engineering of Guangdong Province, South China University of Technology, Guangzhou 510006, China

<sup>c</sup>School of Biomedical Sciences and Engineering, Guangzhou International Campus, South China University of Technology, Guangzhou 511442, China

<sup>d</sup>Key Laboratory of Biomedical Materials and Engineering of the Ministry of Education, and Innovation Center for Tissue Restoration and Reconstruction, Medical Devices Research & Testing Center, South China University of Technology, Guangzhou 510006, China

<sup>e</sup>School of Biopharmacy, China Pharmaceutical University, Nanjing 210009, China; E-mail: [caozt@scut.edu.cn](mailto:caozt@scut.edu.cn)

<sup>f</sup>Department of Liver Surgery, The First Affiliated Hospital of Sun Yat-sen University, Guangzhou 510080, China

<sup>g</sup>Department of General Surgery, Huiya Hospital of The First Affiliated Hospital, Sun Yat-sen University, Huizhou 516081, Guangdong, China; E-mail: [zhouqi@mail.sysu.edu.cn](mailto:zhouqi@mail.sysu.edu.cn)

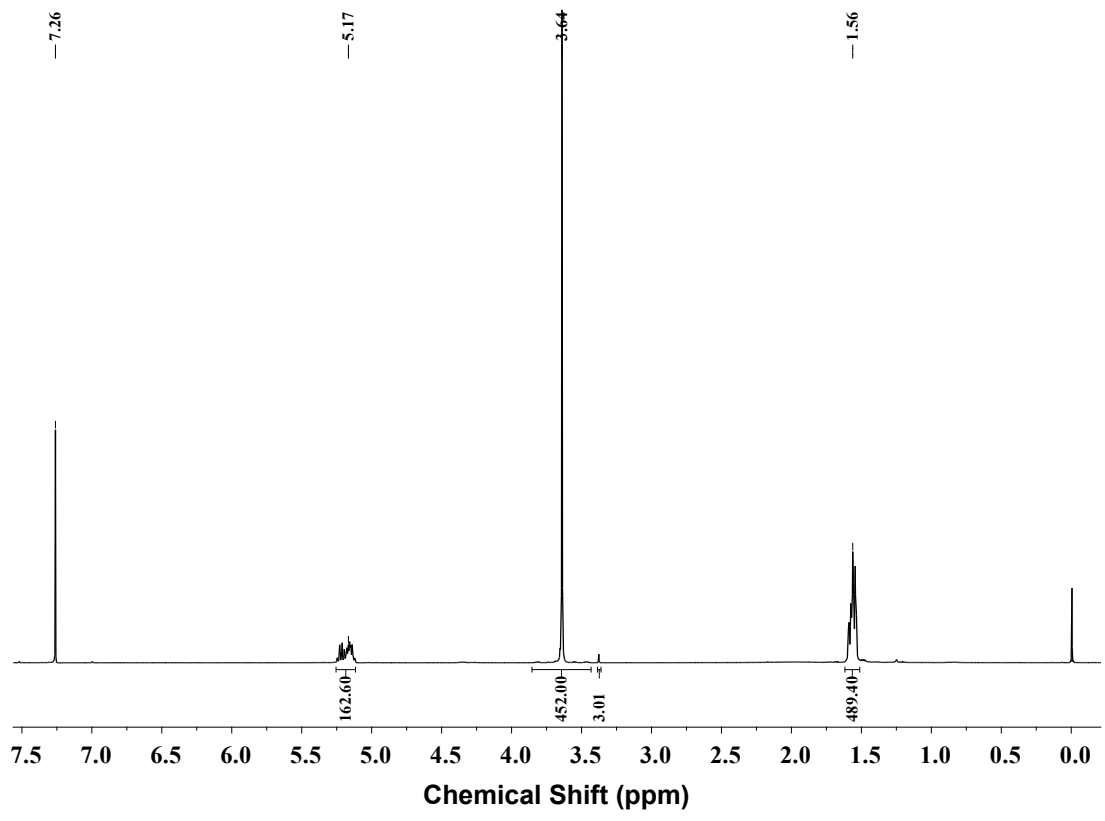

**Fig. S1**  $^1\text{H}$  NMR spectra of PEG-*b*-PLA in  $\text{CDCl}_3$ .

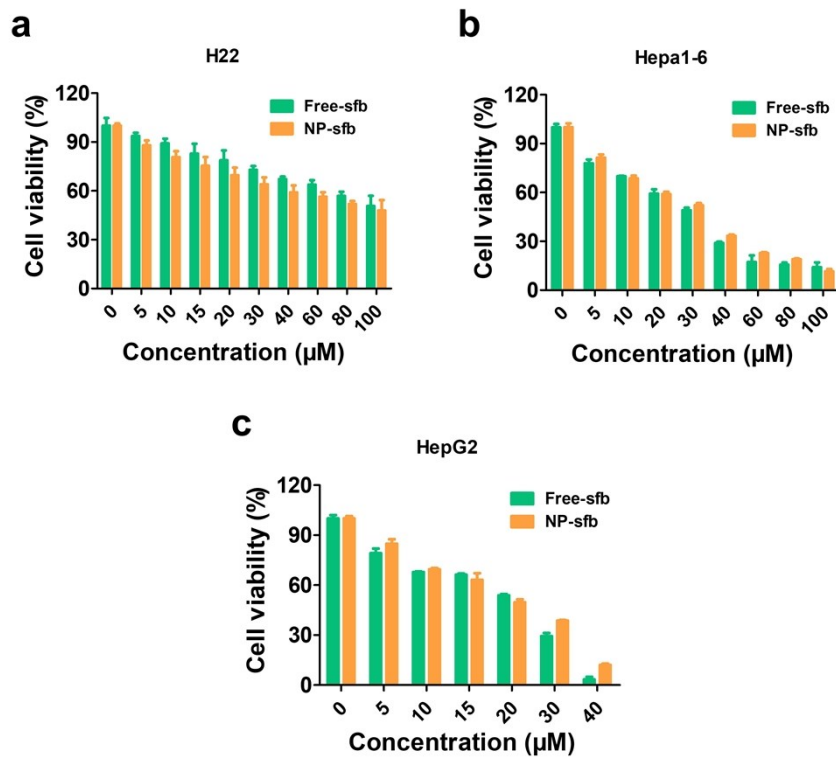

**Fig. S2** Cell viability of H22 (a), Hepa1-6 (b), and HepG2 cells (c) after 24 hours incubation with different concentrations of free-sfb and NP-sfb.

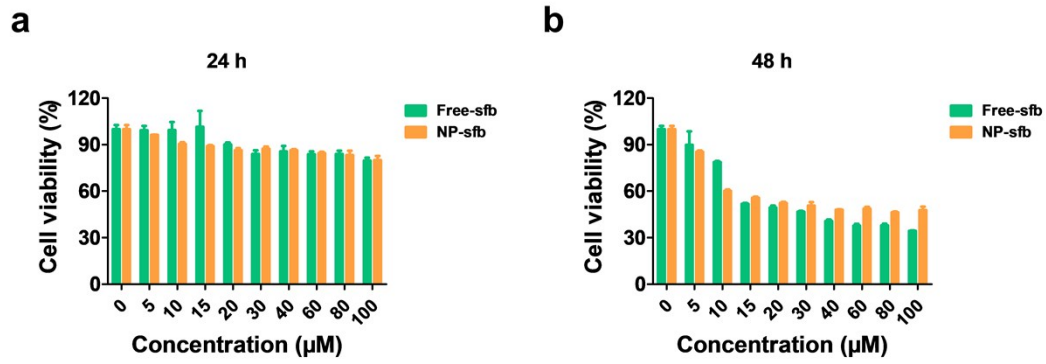

**Fig. S3** Cell viability of normal mouse hepatocytes AML-12 after incubation for 24 hours (a) and 48 hours (b) with varying concentrations of free-sfb and NP-sfb.

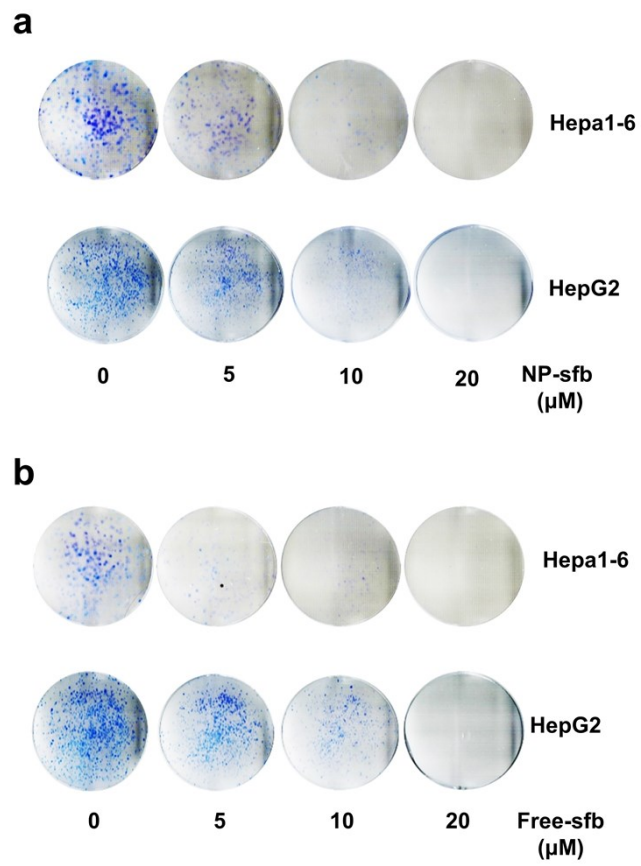

**Fig. S4** The inhibitory effect of free-sfb (a) and NP-sfb (b) on foci formation of Hepa1-6 cells and HepG2 cells.

**a**

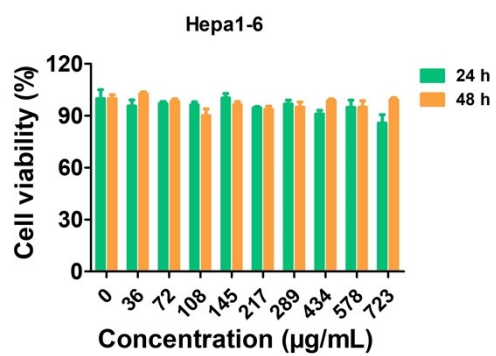

**b**

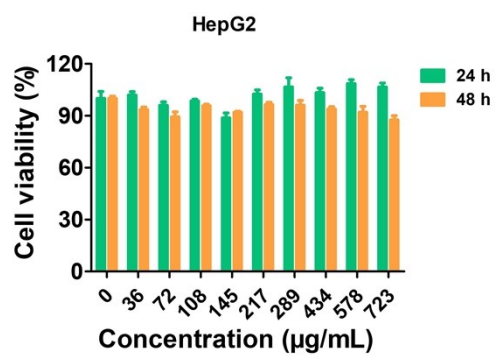

**Fig. S5** Cell viability of Hepa1-6 cells (a) and HepG2 cells (b) after incubation with varying concentrations of blank NP.

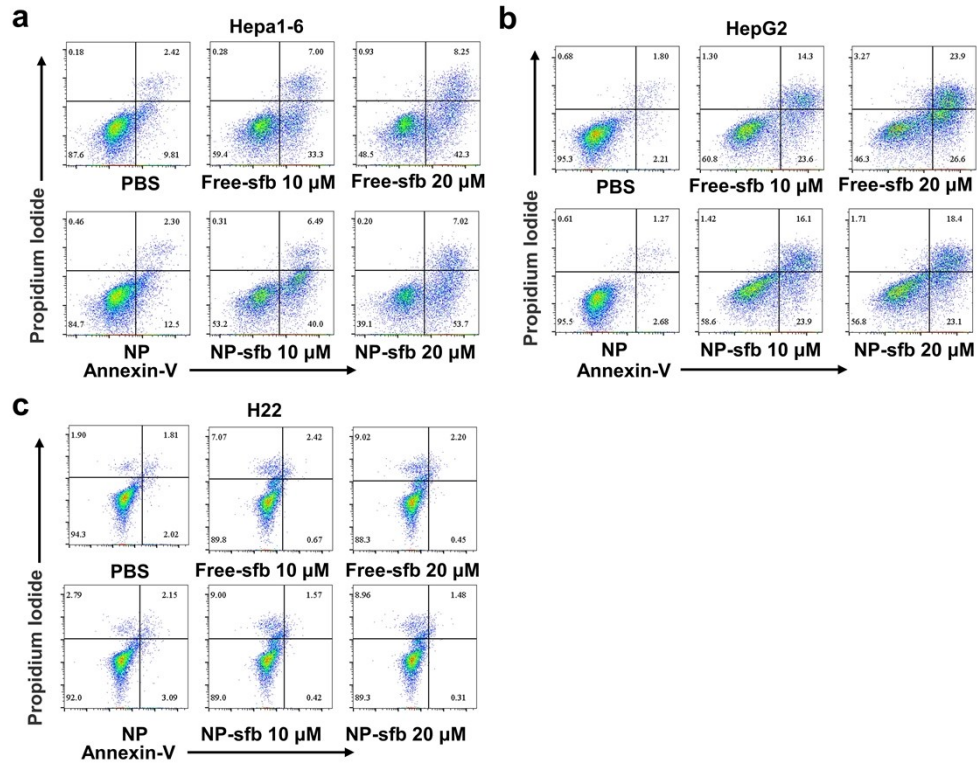

**Fig. S6** NP-sfb promoted the apoptosis of hepatocellular carcinoma cells. Flow cytometry analysis of apoptosis ratio of Hepa1-6 (a), HepG2 (b) and H22 (c) cells after treated with different contents of free-sfb and NP-sfb at 48 hours.

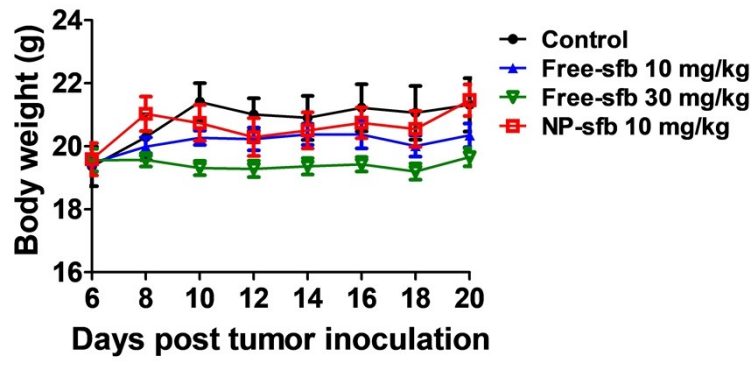

**Fig. S7** Measurement of body weight of H22 tumor-bearing mice when treated with PBS, free-sfb (10 mg/kg, 30 mg/kg) or NP-sfb (10 mg/kg).



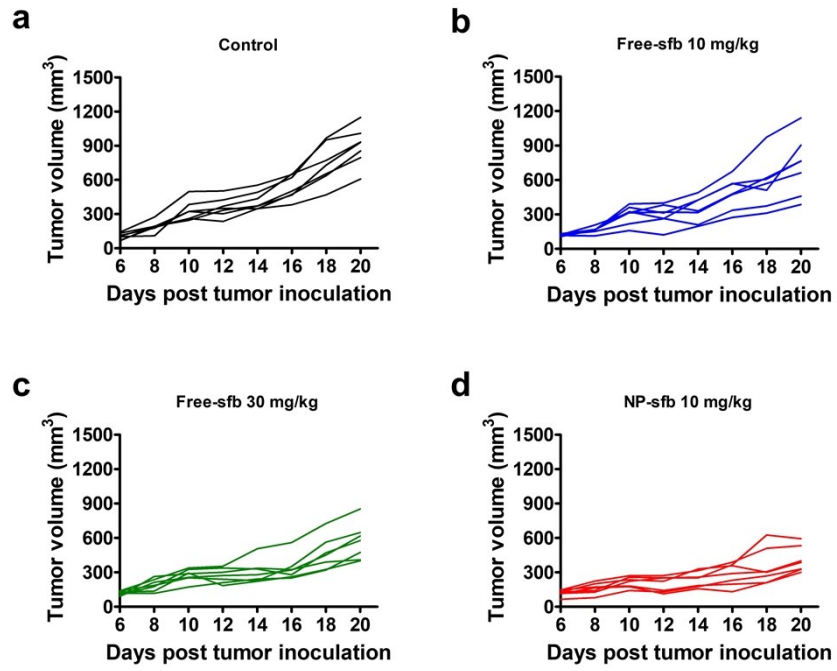

**Fig. S8** Individual tumor growth curve of H22 tumor-bearing mice when treated with PBS, free-sfb (10 mg/kg, 30 mg/kg) or NP-sfb (10 mg/kg).
